# Supplementary material
Source: PubMed Central journal article supplement (PMC1924550)

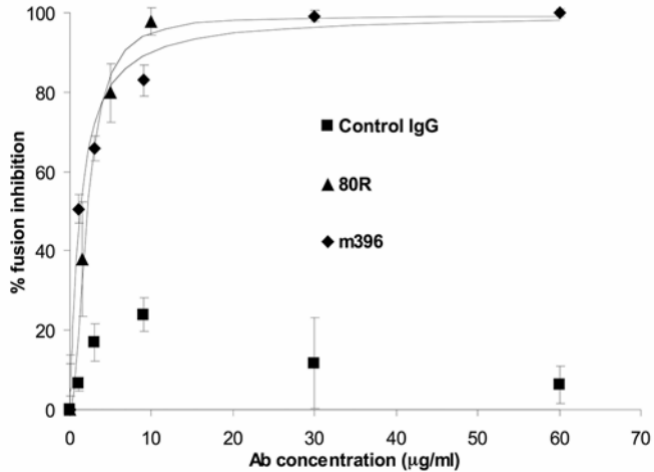

Supplement: pnas_0701000104_1.pdf [file pnas_0701000104_1.pdf]

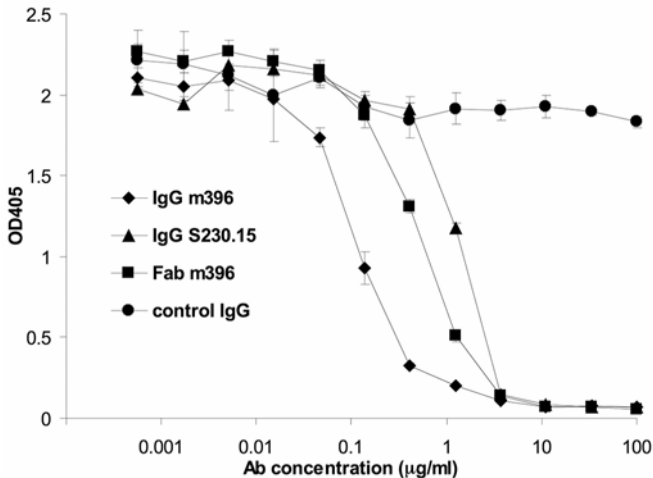

Supplement: pnas_0701000104_2.pdf [file pnas_0701000104_2.pdf]

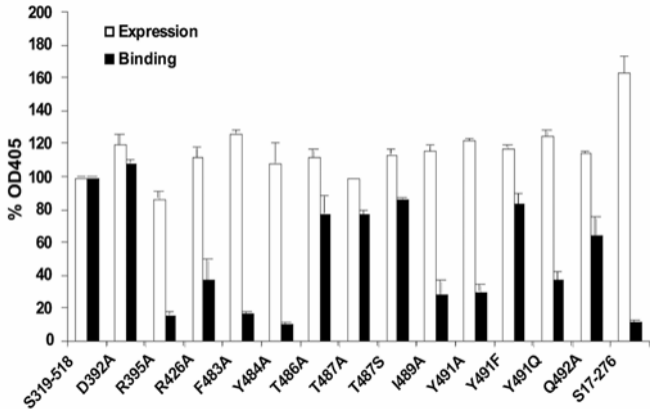

Supplement: pnas_0701000104_3.pdf [file pnas_0701000104_3.pdf]
